# Supplementary material for: Remarkable Rashba spin splitting induced by an asymmetrical internal electric field in polar III–VI chalcogenides
Source: Royal Society of Chemistry journal article supplement (doi:10.1039/d0cp00627k), 2020-01-01
Supplement: d0cp00627k1.pdf [file d0cp00627k1.pdf]

# Remarkable Rashba spin splitting induced by asymmetrical internal electric field in polar III-VI chalcogenides

Weiwei Ju<sup>1,2\*</sup>, Donghui Wang<sup>1</sup>, Tongwei Li<sup>1</sup>, Yi Zhang<sup>1</sup>, Zijian Gao<sup>1</sup>,  
Lixian Ren<sup>1</sup>, Haisheng Li<sup>1</sup>, Shijing Gong<sup>3</sup>

<sup>1</sup>College of Physics and Engineering, Henan Key Laboratory of Photoelectric Energy Storage Materials and Applications, Henan University of Science and Technology, Luoyang 471023, China

<sup>2</sup>State Key Laboratory of Surface Physics and Department of Physics, Fudan University, Shanghai 200433, China

<sup>3</sup>Department of optoelectrics, East China Normal University, Shanghai 200062, China

\*Corresponding author, Email: [hnjww@126.com](mailto:hnjww@126.com)

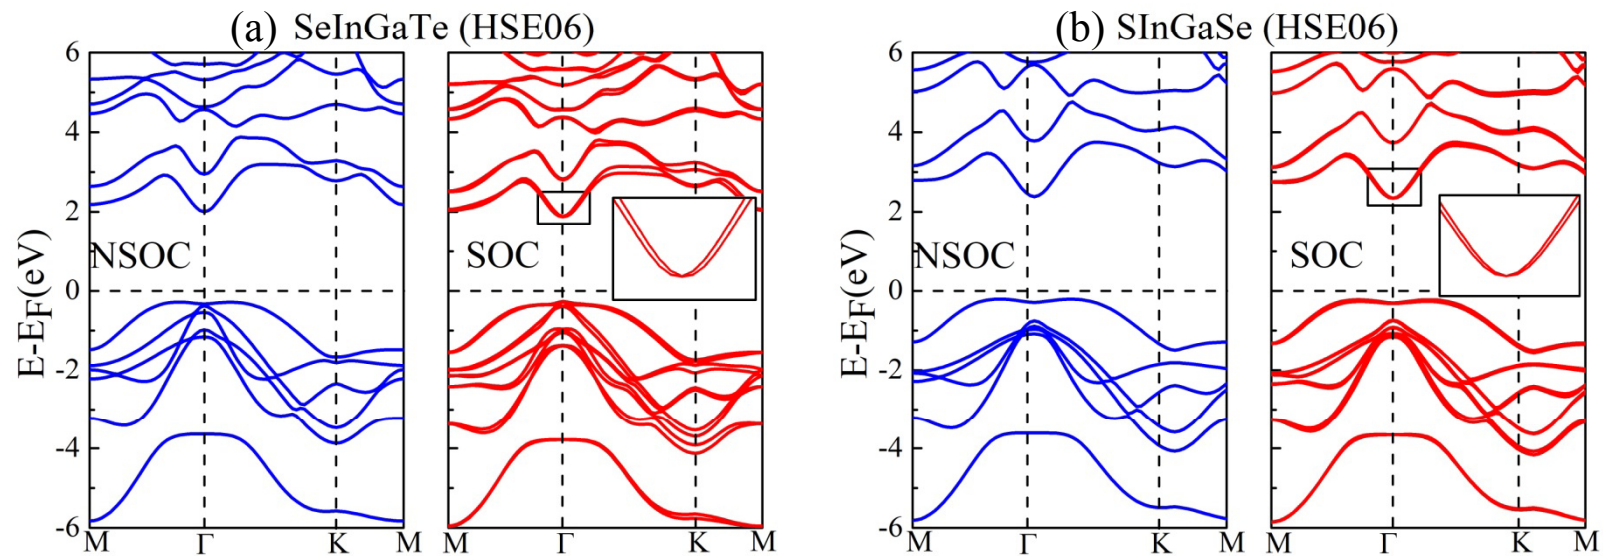

**Fig. S1** Band structures of SeInGaTe and SInGaSe systems without SOC (blue lines) and with SOC (red lines) based on HSE06 hybrid functional method.

(a) SeInGaTe|SeInGaTe

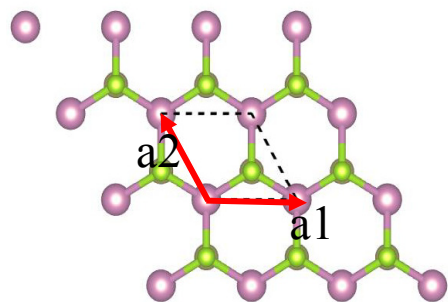

(b) TeGaInSe|SeInGaTe

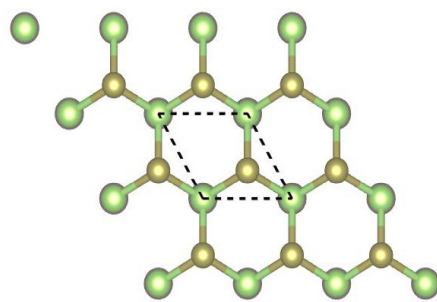

(c) TeGaGaTe|SeInGaTe

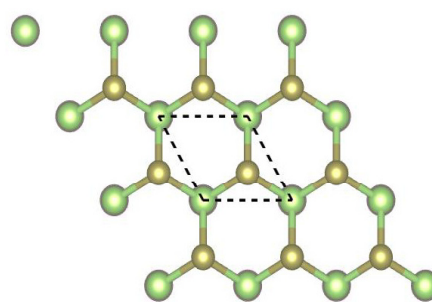

(d) TeGaGaTe|TeGaInSe

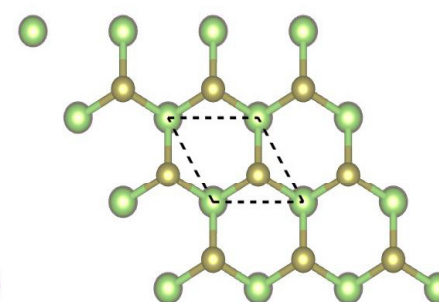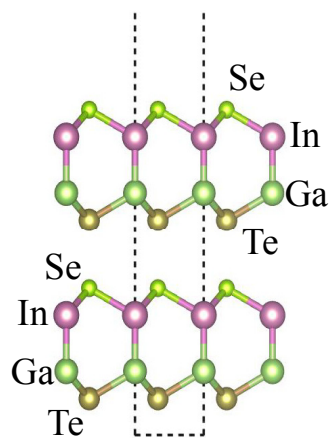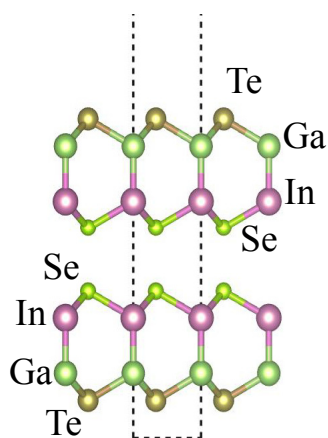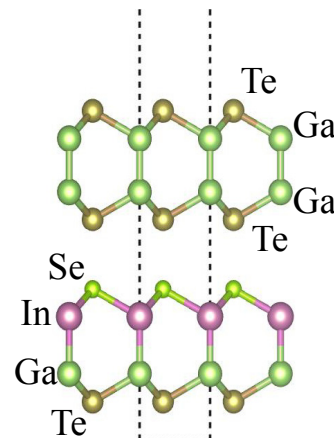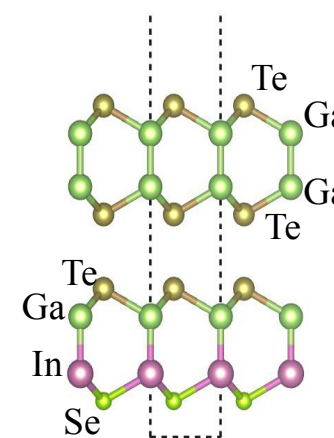

**Fig. S2** The top and side view of SeInGaTe/SeInGaTe homostructure and SeInGaTe/GaTe heterostructure.
